# Supplementary material for: Re-evaluation of mastodon material from Oregon and Washington, USA, Alberta, Canada, and Hidalgo and Jalisco, Mexico
Source: PeerJ. 2025 Jan 23;13:e18848. doi: 10.7717/peerj.18848 (PMC11766676; doi:10.7717/peerj.18848)
Supplement: Supplemental Information 1 [file peerj-13-18848-s001.xlsx]

## Sheet: Export Summary
	This document was exported from Numbers. Each table was converted to an Excel worksheet. All other objects on each Numbers sheet were placed on separate worksheets. Please be aware that formula calculations may differ in Excel.
	Numbers Sheet Name	Numbers Table Name	Excel Worksheet Name
	Table 1
		Table 2	Table 1 - Table 2
	Table 2
		Aggregate M3 data	Table 2 - Aggregate M3 data
	Table 3
		Aggregate m3 data	Table 3 - Aggregate m3 data
	Table 4
		Mammut M3 loph width comparisons	Table 4 - Mammut M3 loph width

## Sheet: Table 1 - Aggregate M3 data
Aggregate M3 data
State/Province	n	Mean maximum length	Median maximum length	SD	Max	Min	Mean maximum width	Median maximum width	SD	Max	Min	Mean L/W	Median L/W	SD	Max	Min
California	39	168.765	168	14.7893	202.77	142.5	85.39	85.2	6.00137	104.26	73.08	1.97816	1.95832	0.135541	2.33498	1.69385
Montana	1	174.7	174.7		174.7	174.7	78.8	78.8		104.26	78.8	2.21701	2.21701		2.21701	2.21701
Oregon	1	149.89	149.89		149.89	149.89	78.61	78.61		104.26	78.61	1.90675	1.90675		1.90675	1.90675
Hidalgo	1	158	158		158	158	82	82		104.26	82	1.92683	1.92683		1.92683	1.92683
Jalisco	1	168.97	168.97		168.97	168.97	81.6	81.6		104.26	81.6	2.07071	2.07071		2.07071	2.07071
Alaska	2	157	157	10.3238	164.3	149.7	95.575	95.575	2.01525	104.26	94.15	1.64192	1.64192	0.0733966	1.69381	1.59002
Arizona	1	188.2	188.2		188.2	188.2	98.2	98.2		104.26	98.2	1.9165	1.9165		1.9165	1.9165
Colorado	4	163.5	163.5	0.57735	164	163	99.3	99.25	1.69902	104.26	97.5	1.64689	1.65254	0.0288464	1.67179	1.61067
Florida	15	177.353	177.3	15.2027	197.4	143.2	99.0733	100.6	7.51156	104.26	82.2	1.79169	1.78623	0.106151	1.95498	1.59224
Georgia	1	184	184		184	184	104	104		104.26	104	1.76923	1.76923		1.76923	1.76923
Illinois	3	181.813	175.94	10.997	194.5	175	104.147	102	6.42485	104.26	99.07	1.74601	1.74643	0.0301171	1.77592	1.71569
Indiana	8	175.317	180.5	20.1013	203	150.04	99.8563	99.75	7.16098	104.26	87.85	1.75424	1.71044	0.138876	1.94737	1.60417
Kentucky	2	164.725	164.725	5.57907	168.67	160.78	91.89	91.89	7.15592	104.26	86.83	1.79571	1.79571	0.0791262	1.85166	1.73976
Louisiana	4	176.015	174	17.7757	196.6	159.46	106.18	104.36	9.73469	104.26	98	1.65667	1.6613	0.021383	1.67694	1.62714
Missouri	23	181.989	181.7	18.0749	213.51	144.3	101.02	101.7	7.91835	104.26	86.6	1.79984	1.79738	0.0806513	1.92644	1.63323
Nebraska	4	180.498	184.125	29.7342	207.01	146.73	100.075	100.93	11.4973	104.26	87.46	1.79882	1.87163	0.150675	1.87903	1.57301
New York	1	172.2	172.2		172.2	172.2	100.2	100.2		104.26	100.2	1.71856	1.71856		1.71856	1.71856
North Carolina	6	166.82	165.16	13.9634	185	152.8	94.5817	93.795	6.29648	104.26	86	1.76354	1.73563	0.0846619	1.92708	1.69909
Ohio	4	180.025	181.75	25.67	205.4	151.2	102.3	104.85	8.97367	104.26	89.5	1.7555	1.74242	0.138498	1.92864	1.60853
Texas	3	171.68	167	11.7417	185.04	163	99.3	97	9.65764	104.26	91	1.73219	1.72165	0.0545178	1.79121	1.68371
Tennessee	1	174.48	174.48		174.48	174.48	98.42	98.42		104.26	98.42	1.77281	1.77281		1.77281	1.77281
Utah	2	151.5	151.5	0.707107	152	151	85.5	85.5	2.12132	104.26	84	1.77258	1.77258	0.0522493	1.80952	1.73563
Washington	1	161.63	161.63		161.63	161.63	88.82	88.82		104.26	88.82	1.81975	1.81975		1.81975	1.81975
Yukon	5	153.04	154.98	5.26981	159.56	146.48	88.44	88.56	0.802029	104.26	87.29	1.73034	1.73425	0.053785	1.80846	1.67808
M. americanum	89	176.034	174.59	17.7052	213.51	143.2	98.8382	99.035	8.01392	118	82.2	1.76469	1.76542	0.0978963	1.95498	1.57301	2
M. pacificus	43	168.2	167.75	14.655	202.77	142.5	84.991	84.28	5.97316	104.26	73.08	1.98092	1.95412	0.13638	2.33498	1.69385	1

## Sheet: Table 2 - Aggregate m3 data
Aggregate m3 data
State/Province/Country	n	Mean maximum length	Median maximum length	SD	Max	Min	Mean maximum width	Median maximum width	SD	Max	Min	Mean L/W	Median L/W	SD	Max	Min
California	23	185.837	187	13.5383	208.82	159.74	82.8617	82.9	6.28453	94.03	68	2.24718	2.25234	0.135948	2.44256	1.95388
Idaho	3	185.933	192.9	19.6968	201.2	163.7	82.7	192.9	6.80882	90.1	76.7	2.24669	2.23307	0.119784	2.37269	2.13429
Hidalgo	1	180	180		180	180	78.55	78.55		78.55	78.55	2.29153	2.29153		2.29153	2.29153
Alaska	3	167.563	169.79	20.6403	187	145.9	90.7633	92.07	10.9486	101	79.22	1.84578	1.84414	0.00509065	1.85149	1.84171
Arizona	1	171.1	171.1		171.1	171.1	82.8	82.8		82.8	82.8	2.06643	2.06643		2.06643	2.06643
Colorado	9	182.444	174.8	11.3859	202.4	171	95.9667	95.7	6.08749	106.8	87.8	1.90837	1.9334	0.174566	2.234	1.6367
Florida	23	181.591	183	14.3533	216.5	155	96.1217	95.9	5.44593	111.6	89.1	1.89053	1.9285	0.125527	2.04469	1.63022
Illinois	10	192.869	187.65	19.5373	240.78	167	102.515	101.5	9.51264	121.91	85	1.88137	1.85488	0.058144	1.97506	1.82212
Indiana	9	185.022	188.5	14.0003	202.3	164	100.133	99	5.02071	108	91.7	1.84872	1.81481	0.124008	2.04343	1.65657
Kansas	2	195	195	11.3137	203	187	100.735	100.735	6.41346	105.27	96.2	1.93612	1.93612	0.0109547	1.94387	1.92837
Kentucky	9	185.352	182.5	14.8545	202.7	165	98.6156	97.1	7.72429	116.5	90.74	1.88126	1.84717	0.0989839	2.01081	1.7279
Louisiana-Mississippi	14	189.119	188.3	25.7189	226.5	113.07	103.578	102.46	7.85825	119.05	93	1.82615	1.87915	0.219334	2.05909	1.16519
Missouri	24	189.65	188.65	14.3583	213	162	98.455	98.85	5.92595	109.8	86	1.92504	1.91224	0.0554441	2.06796	1.82392
Nebraska	4	181.175	181.05	3.62526	184.7	177.9	100.1	100.2	1.27279	101.5	98.5	1.81032	1.81078	0.0510011	1.86701	1.75271
New Mexico	3	166.333	168	12.5831	178	153	89	93	8.26136	94.5	79.5	1.87209	1.91398	0.0818511	1.92453	1.77778
New York	1	196.7	196.7		196.7	196.7	97.6	97.6		97.6	97.6	2.01537	2.01537		2.01537	2.01537
North Carolina	4	180.45	188.9	18.0983	190.6	153.4	91.625	92.15	3.00486	94.4	87.8	1.9669	2.01007	0.152732	2.10033	1.74715
Ohio	4	191.3	191.2	25.2521	222.2	160.6	99.4	101.85	8.72047	106.9	87	1.92029	1.89202	0.117257	2.07858	1.81853
Quebec	1	136	136		136	136	79	79		79	79	1.72152	1.72152		1.72152	1.72152
Tennessee	1	160.9	160.9		160.9	160.9	90.6	90.6		90.6	90.6	1.77594	1.77594		1.77594	1.77594
Texas	5	188.8	195	13.3679	200	168	99.4	100	5.07937	106	93	1.89813	1.90625	0.0573212	1.95	1.80645
Utah	2	169.5	169.5	0.707107	170	169	82.5	82.5	2.12132	84	81	2.05511	2.05511	0.0442721	2.08642	2.02381
Virginia	1	165.6	165.6		165.6	165.6	89.5	89.5		89.5	89.5	1.85028	1.85028		1.85028	1.85028
West Virginia	1	177	177		177	177	97	97		97	97	1.82474	1.82474		1.82474	1.82474
Yukon	2	160.4	160.4	3.74767	163.05	157.75	81.875	81.875	0.657609	82.34	81.41	1.95896	1.95896	0.0300389	1.9802	1.93772
M. americanum	133	183.622	184.15	15.6986	226.5	136	96.8307	96.95	7.2033	121.91	79	1.8902	1.90528	0.122955	2.234	1.16519	2
M. pacificus	27	185.631	187	13.6454	208.82	159.74	82.6841	82.41	6.13764	94.03	68	2.24876	2.25234	0.129674	2.44256	1.95388	1

## Sheet: Table 3 - Mammut M3 loph width 
Mammut M3 Loph Width
	Specimen	Taxon	County	State/Province	1st loph width	2nd loph width	3rd loph width	4th loph width	5th loph width		1st loph width/widest loph width	2nd loph width/widest loph width	3rd loph width/widest loph width	4th loph width/widest loph width	5th loph width/widest loph width
	Perris mastodon	M. pacificus	Riverside	CA	87	82.3	82.4	60.8	44		1	0.945977	0.947126	0.698851	0.505747
	SBMNH specimen B	M. pacificus	Santa Barbara	CA	83.9	85.97	81.72	71.18	49.9		0.975922	1	0.950564	0.827963	0.580435
	SBMNH specimen A	M. pacificus	Santa Barbara	CA	94.88	104.26	102.39	87.02			0.910033	1	0.982064	0.834644
	SDSNH 116399	M. pacificus	San Diego	CA	84.46	80.79	77.31	65.35			1	0.956547	0.915345	0.773739
	UCMP 1060	M. pacificus	Tuolumne	CA	78.13	75.79	72.87	55.12			1	0.97005	0.932676	0.705491
	LACM-HC 87076	M. pacificus	Los Angeles	CA	73.08	72.54	67.97	53.3			1	0.992611	0.930077	0.729338
	UCMP 1567	M. pacificus	Tuolumne	CA	78.54	80.04	74.95	57.64			0.981259	1	0.936407	0.72014
	UCMP 212936	M. pacificus	Alameda	CA	94.64	95.5	91.05	81.69	60.93		0.990995	1	0.953403	0.855393	0.63801
	UCMP 36684	M. pacificus	Alameda	CA	77.91	76.18	73.47	66.12	47.31		1	0.977795	0.943011	0.848672	0.607239
	UCMP 41642	M. pacificus	Sonoma	CA	90	89.36	87.64	71.06			1	0.992889	0.973778	0.789556
	UCMP 45265	M. pacificus	Contra Costa	CA	86.33	89.27	87.81	74.53	49.74		0.967066	1	0.983645	0.834883	0.557186
	UCMP 70139	M. pacificus	Sonoma	CA	86.14	84.35	79.22	66.35			1	0.97922	0.919666	0.770258
	WSC 10829	M. pacificus	Riverside	CA	85.2	81.8	80.3	65.9			1	0.960094	0.942488	0.773474
	WSC 19730	M. pacificus	Riverside	CA	89.5	89.3	84.2	60.5			1	0.997765	0.940782	0.675978
	WSC 22587.1	M. pacificus	Riverside	CA	86.8	84.4	80.9	72.4			1	0.97235	0.932028	0.834101
	WSC 9964.7	M. pacificus	Riverside	CA	75.4	74	65.1	46.8			1	0.981432	0.863395	0.62069
	WSC 18743	M. pacificus	Riverside	CA	79.97	84.1	73.31	55.69			0.950892	1	0.8717	0.662188
	NMC 8060	M. americanum		AK	93.86	94.15	90.39	59.34			0.99692	1	0.960064	0.630271
	DMNH 60675	M. americanum	Pitkin	CO	98.3	96.1	87.8	58.4			1	0.97762	0.893184	0.5941
	DMNH 69327	M. americanum	Pitkin	CO	99.4	100.2	95.1	75.6			0.992016	1	0.949102	0.754491
	DMNH 69331	M. americanum	Pitkin	CO	96.3	98.2	90.4	65.7			0.980652	1	0.92057	0.669043
	DMNH 69943	M. americanum	Pitkin	CO	101.2	97.9	95.5	77.3			1	0.967391	0.943676	0.763834
	LACM 130386	M. americanum	Bureau	IL	108.07	111.37	102.91	93.1			0.970369	1	0.924037	0.835952
	LACM 154685	M. americanum	Allen	IN	83.35	87.85	87.78	62.81			0.948776	1	0.999203	0.714969
	ANSP 13309	M. americanum	Boone	KY	96.95	92.68	90.2	68.37			1	0.955957	0.930376	0.705209
	ANSP 13310	M. americanum	Boone	KY	86.83	83.1	82.32	65.99			1	0.957042	0.948059	0.759991
	LSUMG V-17071	M. americanum	West Feliciana	LA	118	117.7	115	94.8			1	0.997458	0.974576	0.80339
	USNM 437571	M. americanum	Dare	NC	96	93	89	78	56		1	0.96875	0.927083	0.8125	0.583333
	UNSM1642	M. americanum	Dodge	NE	100.9	108.58	102.1	95.45	44.7		0.929269	1	0.940321	0.879075
	UNSM2042-69	M. americanum	Nuckolls	NE	93.28	87.2	82.42	57.72			1	0.93482	0.883576	0.618782
	UNSM1491	M. americanum	Cass	NE	109.24	110.98	107.5	95.02	56.41		0.984321	1	0.968643	0.85619
	UNSM1369	M. americanum	Thurston	NE	86.15	87.46	81.88	70.56	36.15		0.985022	1	0.936199	0.806769
	25BJS76	M. americanum	Hickory	MO	107.01	105.25	103.6	81.36			1	0.983553	0.968134	0.760303
	NMC 8707	M. americanum		Yukon	86.91	87.29	83.05	56.73			0.995647	1	0.951426	0.649903
										Maximum	1	1	0.999203	0.879075	0.63801
										Minimum	0.910033	0.93482	0.863395	0.5941	0.505747
										Average	0.987034	0.984392	0.939305	0.752063	0.578659
