# Supplementary material for: Re-evaluation of mastodon material from Oregon and Washington, USA, Alberta, Canada, and Hidalgo and Jalisco, Mexico
Source: PeerJ. 2025 Jan 23;13:e18848. doi: 10.7717/peerj.18848 (PMC11766676; doi:10.7717/peerj.18848)
Supplement: Supplemental Information 2 [file peerj-13-18848-s002.xlsx]

## Sheet: Sheet 1
Specimen
Alaska	Length	Width	L/W	Locality	County
NMC 8060	164.3	97	1.69381	Dawson Loc 20
NMC 333	149.7	94.15	1.59002	McQuesten River
Arizona
M&M	188.2	98.2	1.9165	M&M site	Yavapai
California
WSC 18743	167.5	84.1	1.99168	Diamond Valley Lake	Riverside
WSC 8817	160.1	86.5	1.85087	Diamond Valley Lake	Riverside
WSC 9622	152.9	77.7	1.96782	Diamond Valley Lake	Riverside
WSC 8904	179.8	95.5	1.88272	Diamond Valley Lake	Riverside
WSC 10819	197	88	2.23864	Diamond Valley Lake	Riverside
WSC 10646	176	84	2.09524	Diamond Valley Lake	Riverside
WSC 9964.7	146	75.4	1.93634	Diamond Valley Lake	Riverside
WSC 22300	168	82	2.04878	Diamond Valley Lake	Riverside
WSC 19730	151.6	89.5	1.69385	Diamond Valley Lake	Riverside
WSC 7387	158.4	82.5	1.92	Diamond Valley Lake	Riverside
WSC 10829	162.2	85.2	1.90376	Diamond Valley Lake	Riverside
WSC 22587	155.2	86.8	1.78802	Diamond Valley Lake	Riverside
LC 0260	190	87	2.18391	Fullerton	Orange
LACM-HC 1258	150	78	1.92308	Rancho La Brea	Los Angeles
LACM-HC 87129	155	83	1.86747	Rancho La Brea	Los Angeles
LACM-HC 87067	172	84	2.04762	Rancho La Brea	Los Angeles
LACM-HC 87133	172	81	2.12346	Rancho La Brea	Los Angeles
LACM-HC 60326	158	83	1.90361	Rancho La Brea	Los Angeles
LACM-HC 87077	179	93	1.92473	Rancho La Brea	Los Angeles
LACM-HC 87071	168	81	2.07407	Rancho La Brea	Los Angeles
LACM-HC 87094	175	90	1.94444	Rancho La Brea	Los Angeles
LACM-HC 87092	172.57	90.54	1.90601	Rancho La Brea	Los Angeles
UCMP 212936	188	95.5	1.96859	Calaveras Dam	Alameda
UCMP 36684	163.84	77.91	2.10294	Doolan Canyon	Alameda
UCMP 45265	182.85	89.27	2.04828	Union Oil Tank Farm	Contra Costa
UCMP 114599	181.79	81.96	2.21803	Homestake Mine Road 1	Lassen
UCMP 41642	166.72	90	1.85244	5 Oaks Ranch	Sonoma
UCMP 70139	168.69	86.14	1.95832	Duckers Ranch, Petaluma	Sonoma
UCMP 1060	142.9	78.13	1.829	Gold Springs Gulch	Tuolumne
LACM 3014	167.31	83.33	2.0078	Sun Valley	Los Angeles
LACM 149514	202.77	86.84	2.33498	Simi Valley 7455	Ventura Co.
WSC 6523.1	157.51	87.56	1.79888	Diamond Valley Lake	Riverside
SBMNH IP A-115	183.89	91.02	2.02033		Santa Barbara
SBMNH Top drawer A	189.46	104.26	1.81719		Santa Barbara
SBMNH 2nd drawer B	187.14	85.97	2.17681		Santa Barbara
SDSNH 116399	160.69	84.46	1.90256	Robertson Ranch, East Village (6044)	San Diego
SBCM 5.3.298	170.8	87	1.96322	Perris	Riverside
LACM-HC 87076	142.5	73.08	1.94992	Rancho La Brea	Los Angeles
UCMP 1567	158.7	80.04	1.98276	Kincaide Flat	Tuolumne
Colorado
DMNH 69331	163	97.5	1.67179	Zeigler Reservoir	Pitkin
DMNH 69327	164	100.2	1.63673	Zeigler Reservoir	Pitkin
DMNH 60675	164	98.3	1.66836	Zeigler Reservoir	Pitkin
DMNH 69943	163	101.2	1.61067	Zeigler Reservoir	Pitkin
Florida
UF 135709	164.8	94.8	1.7384	Aucilla River	Jefferson/Taylor
UF 192226	175.5	103.4	1.69729	Aucilla River	Jefferson/Taylor
UF 135724	159.1	88.7	1.79369	Aucilla River	Jefferson/Taylor
UF 135722	168.3	105.7	1.59224	Aucilla River	Jefferson/Taylor
UF 135725	171.3	105.2	1.62833	Aucilla River	Jefferson/Taylor
UF 135713	177.3	99.2	1.7873	Aucilla River	Jefferson/Taylor
UF 135726	187.7	100.6	1.86581	Aucilla River	Jefferson/Taylor
UF 135723	197.2	110.4	1.78623	Aucilla River	Jefferson/Taylor
CP1-RM 4	197.4	106	1.86226	Aucilla River	Jefferson/Taylor
CP1-BM 3	194.3	101.3	1.91807	Aucilla River	Jefferson/Taylor
DMAS 705	143.2	82.2	1.74209	Daytona Beach	Volusia
UF 40001	187	104.8	1.78435	Ichetucknee River	Columbia
UF 206884	182.4	93.3	1.95498	Munroe Sloth Site	Madison
UF 210253	168.8	94.9	1.77871	Waccasassa River 3	Levy
UF 13505	186	95.6	1.94561	West Palm Beach	Palm Beach
Georgia
CCQ-90-X-Xc	184	104	1.76923	Hannahatchee Creek	Stewart
Illinois
unknown	175	102	1.71569	East St. Louis	St. Clair
LACM 130386	194.5	111.37	1.74643	Fairfield	Bureau
ISM413970	175.94	99.07	1.77592	Prison Grounds, Chester	Randolph
Indiana
71.3.39.11	194.5	103.5	1.87923	Dollens	Madison
71.967.41	185	108	1.71296	Haysville	Dubois
LM 90	176	106.5	1.65258	Lewis	Wabash
71.976.36.1	203	106	1.91509	Madison Co.	Madison
USNM 8204	185	95	1.94737	Pulaski Co.	Pulaski
71.981.91	154	96	1.60417	Richmond	Wayne
CMC VP-1	155	96	1.61458	Rochester	Fulton
LACM 154685	150.04	87.85	1.70791	Pine Valley	Allen
Kentucky
ANSP 13310	160.78	86.83	1.85166	Big Bone Lick	Boone
ANSP 13309	168.67	96.95	1.73976	Big Bone Lick	Boone
Louisiana/Mississippi
LSUMG V-5001	163	98.4	1.6565	Angola	West Feliciana
LSUMG V-17071	196.6	118	1.6661	Tunica Hills	West Feliciana
LSU Cliffwood	185	110.32	1.67694	Cliffwood/Tunica Bayou	West Feliciana
LSUMG V-8484	159.46	98	1.62714	Natchez?	Adams
Hidalgo
UAHMP 311	158	82	1.92683	Ventoquipa
Jalisco
LACM 1854	168.97	81.6	2.07071	Lago de Chapala, Loc.1135 Chapala Fm
Missouri
Unknown	161.1	95	1.69579	Boney Spring	Benton
Unknown	169.3	89.1	1.90011	Boney Spring	Benton
Unknown	166.3	91	1.82747	Boney Spring	Benton
Unknown	174.4	99	1.76162	Boney Spring	Benton
Unknown	180.7	93.8	1.92644	Boney Spring	Benton
Unknown	180.7	103.8	1.74085	Boney Spring	Benton
Unknown	181.7	100.7	1.80437	Boney Spring	Benton
Unknown	191.8	107.7	1.78087	Boney Spring	Benton
Unknown	186.7	101.8	1.83399	Boney Spring	Benton
Unknown	190.9	102.6	1.86062	Boney Spring	Benton
Unknown	191.8	101.7	1.88594	Boney Spring	Benton
Unknown	192.8	108.7	1.77369	Boney Spring	Benton
Unknown	196.7	108.6	1.81123	Boney Spring	Benton
Unknown	203.6	110.7	1.83921	Boney Spring	Benton
Unknown	204.5	106.4	1.92199	Boney Spring	Benton
Unknown	205.8	114.5	1.79738	Boney Spring	Benton
65BS68	213.51	111.16	1.92074	Boney Spring	Benton
Unknown	144.3	86.6	1.66628	Trolinger Spring	Hickory
Unknown	151.4	92.7	1.63323	Trolinger Spring	Hickory
Unknown	154.7	88.7	1.74408	Trolinger Spring	Hickory
Unknown	179.3	101.1	1.77349	Trolinger Spring	Hickory
Unknown	179.3	101.1	1.77349	Trolinger Spring	Hickory
25BJS76	184.43	107.01	1.72348	Jones Spring	Hickory
Montana
MOR 605	174.7	78.8	2.21701	Doeden Pit PL-084	Custer
Nebraska
UNSM1642	203.91	108.58	1.87797	Fremont	Dodge
UNSM2042-69	146.73	93.28	1.57301		Nuckolls
UNSM1491	207.01	110.98	1.86529		Cass
UNSM1369	164.34	87.46	1.87903	Pender	Thurston
New York
NYSM-VP 103	172.2	100.2	1.71856	Arborio	Orange
North Carolina
NCSM 087	155	90.8	1.70705		Pender
NCSM 086	174.7	100.5	1.73831		Pender
NCSM 079	177.8	102.6	1.73294	T.E. Cooper Farm	Brunswick
NCSM-013	152.8	86	1.77674	Walton Farm
USNM 437571	185	96	1.92708	Salvo, Hatteras Island	Dare
USNM 202	155.62	91.59	1.69909		Pitt
Ohio
CMC VP 145	151.2	89.5	1.68939	Clermont County	Clermont
CMC VP 7468	197.5	110	1.79545	Hamilton County	Hamilton
CMC VP 47	166	103.2	1.60853	Shaw Ave, Hyde Park, Cincinnati	Hamilton
G27831	205.4	106.5	1.92864	Springfield	Clark
Oregon
F-30282	149.89	78.61	1.90675	Tualatin	Washington
Tennessee
USNM 11794	174.48	98.42	1.77281		Tipton
Texas
UCMP 49758	185.04	109.9	1.68371	Connor Creek	Young
TMM 30967-773	163	91	1.79121	Ingleside	San Patricio
TMM 30967-985	167	97	1.72165	Ingleside	San Patricio
Utah
BYUVP 4378	151	87	1.73563	Sanpete Co.	Sanpete
BYUVP 4379	152	84	1.80952	Sanpete Co.	Sanpete
Washington
UWBM 83312	161.63	88.82	1.81975	Shine C0700	Jefferson
Yukon
YG 26.1	148.93	88.56	1.68168
YG 43.2	159.56	88.23	1.80846
YG 139.5	154.98	88.6	1.74921
YG 361.32	155.25	89.52	1.73425
NMC 8707	146.48	87.29	1.67808	"Junction, Independence + Hunker Creeks, Dawson area, Y.T." - "under 60' frozen tundra, above gravels"
