# Supplementary material for: Re-evaluation of mastodon material from Oregon and Washington, USA, Alberta, Canada, and Hidalgo and Jalisco, Mexico
Source: PeerJ. 2025 Jan 23;13:e18848. doi: 10.7717/peerj.18848 (PMC11766676; doi:10.7717/peerj.18848)
Supplement: Supplemental Information 3 [file peerj-13-18848-s003.xlsx]

## Sheet: Sheet 1
Specimen
Alaska	Length	Width	L/W	Locality	County
F:AM 27009	187	101	1.85149	Fairbanks
NMC 14252	145.9	79.22	1.84171	Old Crow Loc 13
USNM 5101	169.79	92.07	1.84414	Yukon District
Arizona
No Number (Bowie)	171.1	82.8	2.06643	San Simon Valley	Cochise
California
WSC 18743	187.1	76.6	2.44256	Diamond Valley Lake	Riverside
WSC 8817	184.3	80	2.30375	Diamond Valley Lake	Riverside
WSC 19730	173.7	88.9	1.95388	Diamond Valley Lake	Riverside
LC 0260	199	82.9	2.40048	Fullerton	Orange
UCMP 198852	199.7	83	2.40602	Rancho La Brea	Los Angeles
UCMP 198853	190	83.1	2.2864	Rancho La Brea	Los Angeles
LACM-HC 87326	190	78	2.4359	Rancho La Brea	Los Angeles
LACM-HC 77	187	79	2.36709	Rancho La Brea	Los Angeles
LACM-HC 87068	167	75	2.22667	Rancho La Brea	Los Angeles
LACM-HC 87072	193	83	2.3253	Rancho La Brea	Los Angeles
LACM-HC 87073	163	68	2.39706	Rancho La Brea	Los Angeles
LACM-HC 87069	173	80	2.1625	Rancho La Brea	Los Angeles
UCMP 1569	198.5	87.3	2.27377	Mormon Ranch	Tuolumne
LACM 130515	178.43	79.22	2.25234	Churro Creek Site	San Luis Obispo
LACM 44706	185.26	82.41	2.24803	Outfill Sewer, Rodeo Kelley	Los Angeles
LACM 125982	196.67	94.03	2.09157	Chandler's Sand Pit	San Pedro
LACM 149514	208.82	89.8	2.32539	Simi Valley 7455	Ventura Co.
LACM 152669	159.74	76.68	2.0832	Lakes at Thousand Oaks	Ventura
SBMNH IP A-115	199.78	93.36	2.13989		Santa Barbara
SBMNH reconstructed jaw	202.58	90.26	2.24441		Santa Barbara
SBMNH exhibit jaw	184.67	89.25	2.06913		Santa Barbara
SDSNH 116399	186.36	84.66	2.20128	Robertson Ranch, East Village (6044)	San Diego
SBMNH #136	166.64	81.35	2.04843	Carpinteria	Santa Barbara
Colorado
DMNH 58820	174.8	93	1.87957	Jefferson Co.	Jefferson
DMNH 69928	185.8	96.1	1.9334	Zeigler Reservoir	Pitkin
DMNH 69927	196	100.9	1.94252	Zeigler Reservoir	Pitkin
DMNH 69922	174.8	87.8	1.99089	Zeigler Reservoir	Pitkin
DMNH 69923	171	101.4	1.68639	Zeigler Reservoir	Pitkin
DMNH 70763	174.8	106.8	1.6367	Zeigler Reservoir	Pitkin
DMNH 69926	202.4	90.6	2.234	Zeigler Reservoir	Pitkin
DMNH 69929	173	91.4	1.89278	Zeigler Reservoir	Pitkin
DMNH 69925	189.4	95.7	1.9791	Zeigler Reservoir	Pitkin
Florida
UF 135705	183	89.5	2.04469	Aucilla River	Jefferson/Taylor
UF 135712	158.3	92.9	1.70398	Aucilla River	Jefferson/Taylor
UF 135721	164	100.6	1.63022	Aucilla River	Jefferson/Taylor
UF 211300	167	101.2	1.6502	Aucilla River	Jefferson/Taylor
UF 135720	173	89.9	1.92436	Aucilla River	Jefferson/Taylor
UF 135714	177.2	89.1	1.98878	Aucilla River	Jefferson/Taylor
UF 135715	186.1	96.5	1.9285	Aucilla River	Jefferson/Taylor
UF 135703	187	94.9	1.9705	Aucilla River	Jefferson/Taylor
UF 135704	187.7	96.6	1.94306	Aucilla River	Jefferson/Taylor
UF 135717	187.9	95.5	1.96754	Aucilla River	Jefferson/Taylor
UF 135701	199.5	99.4	2.00704	Aucilla River	Jefferson/Taylor
UF 135718	216.5	106.2	2.03861	Aucilla River	Jefferson/Taylor
CP1-BM 1	155	94.5	1.64021	Aucilla River	Jefferson/Taylor
CP1-BM 8	201.3	111.6	1.80376	Aucilla River	Jefferson/Taylor
UF 200661	174.8	91.5	1.91038	Aucilla River Sloth Hole	Jefferson/Taylor
UF 200681	182.3	96	1.89896	Aucilla River Sloth Hole	Jefferson/Taylor
DMAS 578	191.4	98.1	1.95107	Daytona Beach	Volusia
CP1-HM 9	185	98.4	1.88008	Dickerson Pit	St. Lucie
UF 51192	178.4	89.7	1.98885	Palm Beach Farm	Palm Beach
G47?	163	90.2	1.8071	St. Petersburg	Pinellas
UF 210251	181	95.7	1.89133	Waccasassa River 3	Levy
UF 210252	189.6	96.9	1.95666	Waccasassa River 3	Levy
UF 18504	187.6	95.9	1.9562	West Palm Beach	Palm Beach
Hidalgo
UAHMP 311	180	78.55	2.29153	Ventoquipa
Idaho
IMNH 39139	201.2	90.1	2.23307	Gay Mine	Bingham
IMNH 39156	192.9	81.3	2.37269	Gay Mine	Bingham
USNM 13701	163.7	76.7	2.13429	American Falls	Power
Illinois
FMP 39395	167	85	1.96471	Croven Cave	Monroe
No number	191	104	1.83654	Hawthorne Farm	Ford
FM P UC 1509	183.2	96.8	1.89256	Kittleson Farm	Kendall
FM P 14057	197.7	108.5	1.82212	Minooka	Grundy
FMP 14591	184.3	100.6	1.83201	Minooka	Grundy
FMP 61120	182.4	99.1	1.84057	Whitewillow	Kendall
FM P 12780	198.7	102.4	1.94043	Whitewillow	Kendall
FMP 12777	199.9	108.1	1.84921	Whitewillow	Kendall
ISM413970	183.71	98.74	1.86054	Prison Grounds, Chester	Randolph
ISM497315	240.78	121.91	1.97506	Belleville	St. Claire
Indiana
IUPUI-2	170.2	91.7	1.85605	Christensen	Hancock
DMNH 1496	195.9	97.7	2.00512	De Kalb Co.	De Kalb
FMP 1173	202.3	99	2.04343	Delco Farm	Lake
71.3.39.1	196	108	1.81481	Dollens	Madison
LM 90	188.5	106	1.7783	Lewis	Wabash
71.981.70	197	102	1.93137	Orange Co.	Orange
USNM 8204	180	102	1.76471	Pulaski Co.	Pulaski
CMC VP-1	164	99	1.65657	Rochester (Overmeyer)	Fulton
JMM VP-20	171.3	95.8	1.7881	Wayne Co.	Wayne
Kansas
KU 4929	187	96.2	1.94387	McPherson	McPherson
LACM 154598	203	105.27	1.92837	Arkansas River 50mi S of Wichita	Cowley
Kentucky
UNSM 516-62	199.1	101.1	1.96934	Big Bone Lick	Boone
MNHN 1643 Lectotype	202.7	101.1	2.00495	Big Bone Lick	Boone
MNHN 1644	165	90.9	1.81518	Big Bone Lick	Boone
MNHN 1657	182.5	98.8	1.84717	Big Bone Lick	Boone
MNHN 1640	201.3	116.5	1.7279	Big Bone Lick	Boone
MNHN 315	181	94.3	1.91941	Big Bone Lick	Boone
ANSP 13102	165.66	90.74	1.82566	Big Bone Lick	Boone
ANSP 13103	175.66	97	1.81093	Big Bone Lick	Boone
ANSP 13135	195.25	97.1	2.01081	Big Bone Lick	Boone
Louisiana-Mississippi
LSUMG V-14527	183.3	98	1.87041	Tunica Hills	West Feliciana
LSUMG V-14529	183.9	94.8	1.93987	Kimball Creek	West Feliciana
LSUMG V-1604	213.8	105.6	2.02462	Ward's Creek	East Baton Rouge
LSUMG V-8864	226.5	110	2.05909	Ward's Creek	East Baton Rouge
LSUMG V-19517	187.2	105.8	1.76938	unknown	Adams?
LSUMG V-19521	185.7	104.3	1.78044	unknown	Adams?
GML2145/WCMFL289	191.6	101.2	1.89328	Ward's Creek	East Baton Rouge
WCMFL13	188.6	99.9	1.88789	Ward's Creek	East Baton Rouge
Yale unknown	188	93	2.02151	Natchez	Adams
LSUMG V-23169	198	103.72	1.90899	Little Bayou Sara	Wilkinson
LSUMG V-22743	178	99.48	1.7893	Avery Island	Iberia
LSUMG exhibit	202	118.2	1.70897	Natchez	Adams
LSU Cliffwood	113.07	97.04	1.16519	Cliffwood/Tunica Bayou	West Feliciana
LSUMG V-618	208	119.05	1.74717	Ward's Creek	East Baton Rouge
Missouri
Unknown	172.2	92.2	1.86768	Boney Spring	Benton
Unknown	175.2	93.4	1.8758	Boney Spring	Benton
Unknown	175.3	92.2	1.9013	Boney Spring	Benton
Unknown	181.5	96.2	1.88669	Boney Spring	Benton
Unknown	182.4	94	1.94043	Boney Spring	Benton
Unknown	183.2	98.2	1.86558	Boney Spring	Benton
Unknown	188.1	98.2	1.91548	Boney Spring	Benton
Unknown	189.2	95.2	1.98739	Boney Spring	Benton
Unknown	193	101.1	1.909	Boney Spring	Benton
Unknown	194.7	103.1	1.88846	Boney Spring	Benton
Unknown	197.9	100.1	1.97702	Boney Spring	Benton
Unknown	201.5	104	1.9375	Boney Spring	Benton
Unknown	207.4	103.2	2.00969	Boney Spring	Benton
Unknown	213	103	2.06796	Boney Spring	Benton
Unknown	209.2	109.8	1.90528	Boney Spring	Benton
82BS68	212.85	109.8	1.93852	Boney Spring	Benton
Unknown	162	86	1.88372	Trolinger Spring	Hickory
Unknown	173.2	89.8	1.92873	Trolinger Spring	Hickory
Unknown	186.8	99.5	1.87739	Trolinger Spring	Hickory
Unknown	184	96.5	1.90674	Trolinger Spring	Hickory
47JS74	199.61	99.68	2.00251	Jones Spring	Hickory
153JS73	168.84	92.57	1.82392	Jones Spring	Hickory
45JS76	201.09	102.13	1.96896	Jones Spring	Hickory
21JS76	199.4	103.04	1.93517	Jones Spring	Hickory
Nebraska
UNSM 1465	183.9	98.5	1.86701	Beatrice, Gage Co.	Gage
UNSM 1685	177.9	101.5	1.75271	Hebron	Thayer
UNSM 1657	178.2	99.8	1.78557	Nemaha River	Johnson?
UNSM 88534	184.7	100.6	1.83598	Rh-101
New Mexico
NMMNH P-25546	153	79.5	1.92453	Las Lunas	Valencia
NMMNH P-25098	168	94.5	1.77778	Lemitar	Socorro
No number	178	93	1.91398	Trapped Rock	McKinley
New York
NYSM-VP 54	196.7	97.6	2.01537	Perkinsville	Steuben
North Carolina
NCSM 083	190.5	90.7	2.10033	Goldsboro	Wayne
NCSM 041	187.3	93.6	2.00107	Maysville	Jones
NCSM 047	190.6	94.4	2.01907	Maysville	Jones
NCSM 013	153.4	87.8	1.74715	Walton Farm
Ohio
Boonshoft AccN 225-46	188.4	103.6	1.81853	Darke Co.	Darke
JMM VP-2992	222.2	106.9	2.07858	Harper	Logan
CMC VP 1120	194	100.1	1.93806	Mill Creek, Evendale	Hamilton
CMNH 10334	160.6	87	1.84598	Portage Co.	Portage
Quebec
No number	136	79	1.72152	Lac Saint-Jean
Tennessee
1989.31.1	160.9	90.6	1.77594		Davidson
Texas
TMM 30967-1650	195	100	1.95	Ingleside	San Patricio
TMM 30967-339	168	93	1.80645	Ingleside	San Patricio
TMM 30967-352	200	106	1.88679	Ingleside	San Patricio
TMM 30967-414	198	102	1.94118	Ingleside	San Patricio
TMM 30967-904	183	96	1.90625	Ingleside	San Patricio
Utah
BYUVP 4378	170	84	2.02381	Sanpete Co.	Sanpete
BYUVP 4379	169	81	2.08642	Sanpete Co.	Sanpete
Virginia
No number	165.6	89.5	1.85028	Saltville	Smyth
Washington (M. sp.)
Uncatalogued	184	87.9	2.09329	Manis site	Clallam
UWBM 14491	164.6	78.01	2.10999	Port Angeles	Clallam
UWBM 88099	165.68	85.58	1.93597	Winlock area C0856	Lewis
West Virginia
No number	177	97	1.82474	Cottonwood Creek	Roane
Yukon
YG 361.31	163.05	82.34	1.9802
NMC 42552	157.75	81.41	1.93772	"Sixtymile Loc. 3, Y.T."
